# Supplementary material
Source: publisher site journal article supplement (https://static.cambridge.org/content/id/urn:cambridge.org:id:article:S2059866119004345/resource/name/S2059866119004345supp003.xlsx)
Supplement: Supplementary file 1 [file S2059866119004345supp003.xlsx]

## Sheet: 90 popular MeSH terms on public
90 Popular MeSH Terms on Public Health
MeSH Terms	Counts of News Articles
risk	26457
etiology	23595
hospitalization	15061
housing	11613
poverty	8738
diagnosis	8463
infant	6496
physiology	6466
public health	6215
disease outbreaks	5929
exercise	5749
alcohol drinking	5047
world health organization	5030
smoking	4981
complications	4655
genetics	4595
diet	4522
neoplasms	4521
treatment outcome	4364
obesity	4334
adverse effects	3824
sexual behavior	3486
incidence	3456
depression	3374
pregnancy	3063
risk factors	2822
mortality	2697
hiv infections	2436
drug therapy	2044
psychology	2044
tobacco products	1741
prevalence	1700
toxicity	1576
utilization	1535
asthma	1417
metabolism	1307
quality of life	1271
epidemiology	1227
ethics	1219
prevention & control	1212
cardiovascular diseases	1212
biomarkers	1168
chronic disease	1093
cause of death	1025
body mass index	969
mental disorders	932
smoking cessation	805
global health	789
physiopathology	755
nicotine	620
health policy	496
socioeconomic factors	491
immunology	452
health services accessibility	410
pharmacology	359
pathology	338
air pollution	306
air pollutants	299
social support	267
risk assessment	260
drug effects	256
health surveys	241
tobacco industry	241
health behavior	234
microbiology	196
health promotion	174
palliative care	163
stress, psychological	142
virology	140
environmental exposure	61
social class	56
isolation & purification	53
therapeutic use	52
comorbidity	47
smoking prevention	44
occupational exposure	37
environmental monitoring	27
environmental pollutants	23
risk-taking	21
air pollution, indoor	20
mass screening	12
ethnology	7
occupational diseases	7
evidence-based medicine	6
adolescent behavior	5
maternal exposure	5
tobacco smoke pollution	4
tobacco use disorder	3
time factors	2
attitude to health	2
